# Supplementary material for: Structural rigidity accelerates quantum decoherence and extends carrier lifetime in porphyrin nanoballs: a time domain atomistic simulation
Source: Royal Society of Chemistry journal article supplement (doi:10.1039/d0na00001a), 2020-01-01
Supplement: d0na00001a1.pdf [file d0na00001a1.pdf]

**Structural Rigidity Accelerates Quantum Decoherence and Extends Carrier Lifetime in  
Porphyrin Nanoball: A Time Domain Atomistic Simulation**

*Ritabrata Sarkar<sup>†</sup>, Md Habib<sup>†</sup>, Moumita Kar<sup>‡</sup>, Anup Pramanik<sup>‡</sup>, Sougata Pal,<sup>†\*</sup> Pranab Sarkar<sup>‡</sup>.*

*<sup>†</sup>Department of Chemistry, University of GourBanga, Malda, 732103, India*

*<sup>‡</sup>Department of Chemistry, Visva-Bharati University, Santiniketan - 731235, India*

***Supplementary information***

**Table S1. Standard deviation of fluctuation of atoms of the porphyrin nanoballs.**

| Average atomic fluctuation ( $\text{\AA}^3$ ) | Zn    | Cd    |
|-----------------------------------------------|-------|-------|
| T0                                            | 0.058 | 0.015 |
| T6                                            | 0.007 | 0.006 |
| T14                                           | 0.003 | 0.003 |

**Table S2. Comparison between the ground and excited state geometries of Zn-porphyrin nanoball (Zn-T0).**

| System | Ground state                |                             | Excited state              |                             |
|--------|-----------------------------|-----------------------------|----------------------------|-----------------------------|
|        | Major axis ( $\text{\AA}$ ) | Minor axis ( $\text{\AA}$ ) | Major axis( $\text{\AA}$ ) | Minor axis ( $\text{\AA}$ ) |
| Zn-T0  | 50.890                      | 24.780                      | 50.893                     | 24.781                      |
|        | 50.884                      | 24.798                      | 50.886                     | 24.801                      |

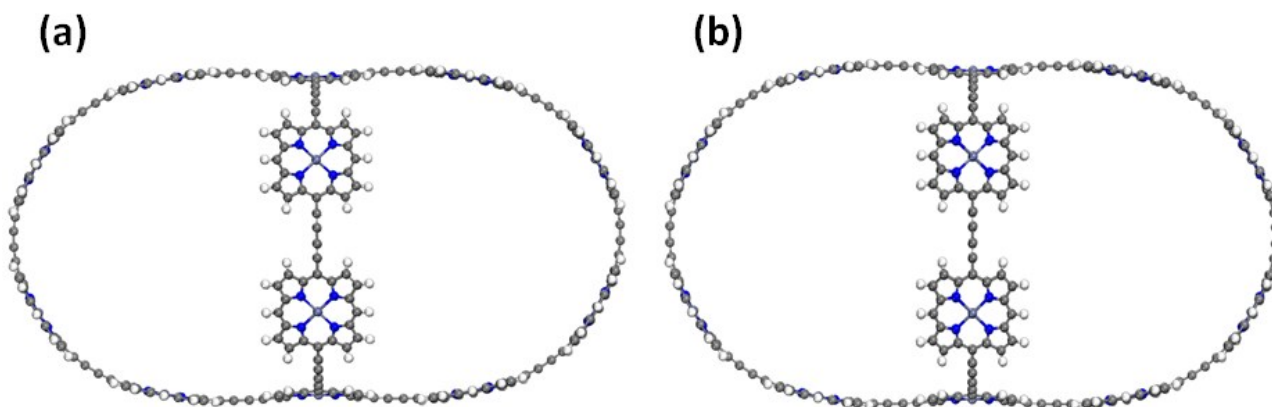

**Figure S1: Ground (a) and excited state (b) geometries of Zn-T0 nanoball.**
